# Supplementary material
Source: PubMed Central journal article supplement (PMC9284234)

# Supplemental Figure 1

A.

| TMA        | patients [n]       | cores [n] |
|------------|--------------------|-----------|
| hemangioma | 98<br>(64 f, 34 m) | 181       |
| border     | 80                 | 80        |
| liver      | 78                 | 78        |

B.

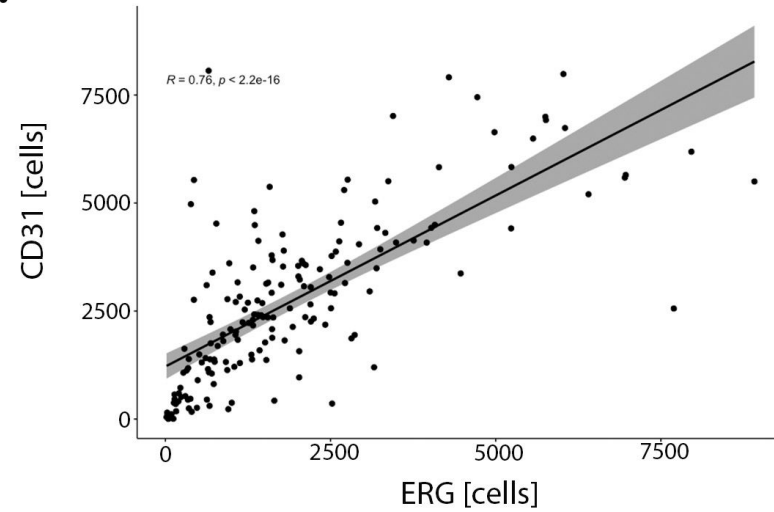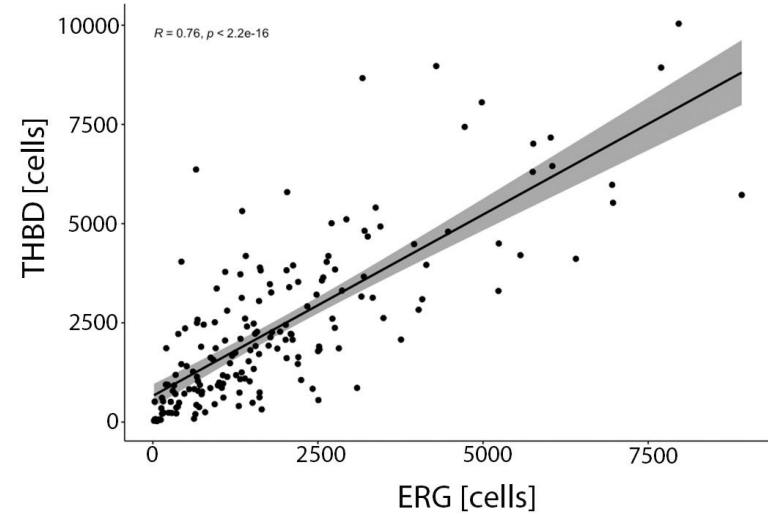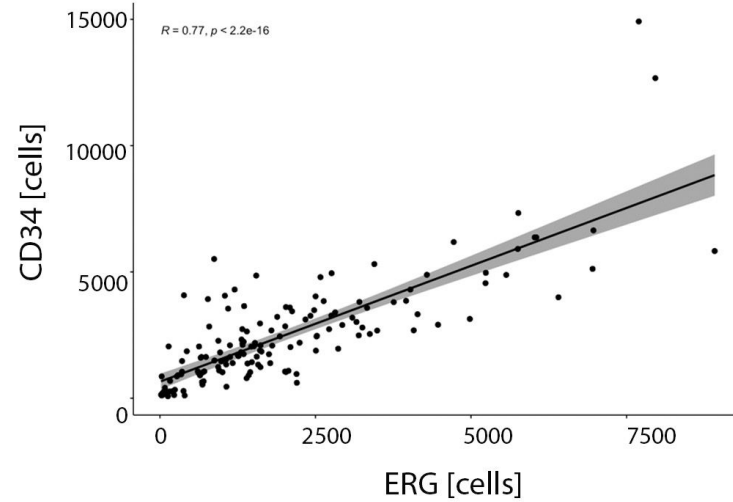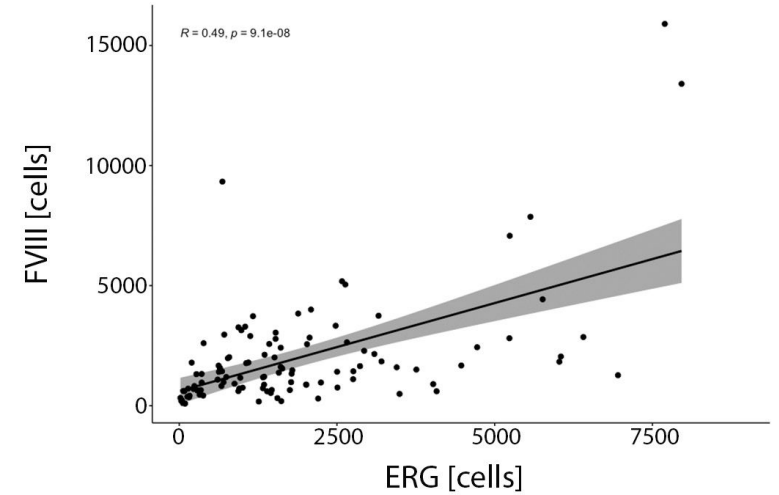

# Supplemental Figure 2

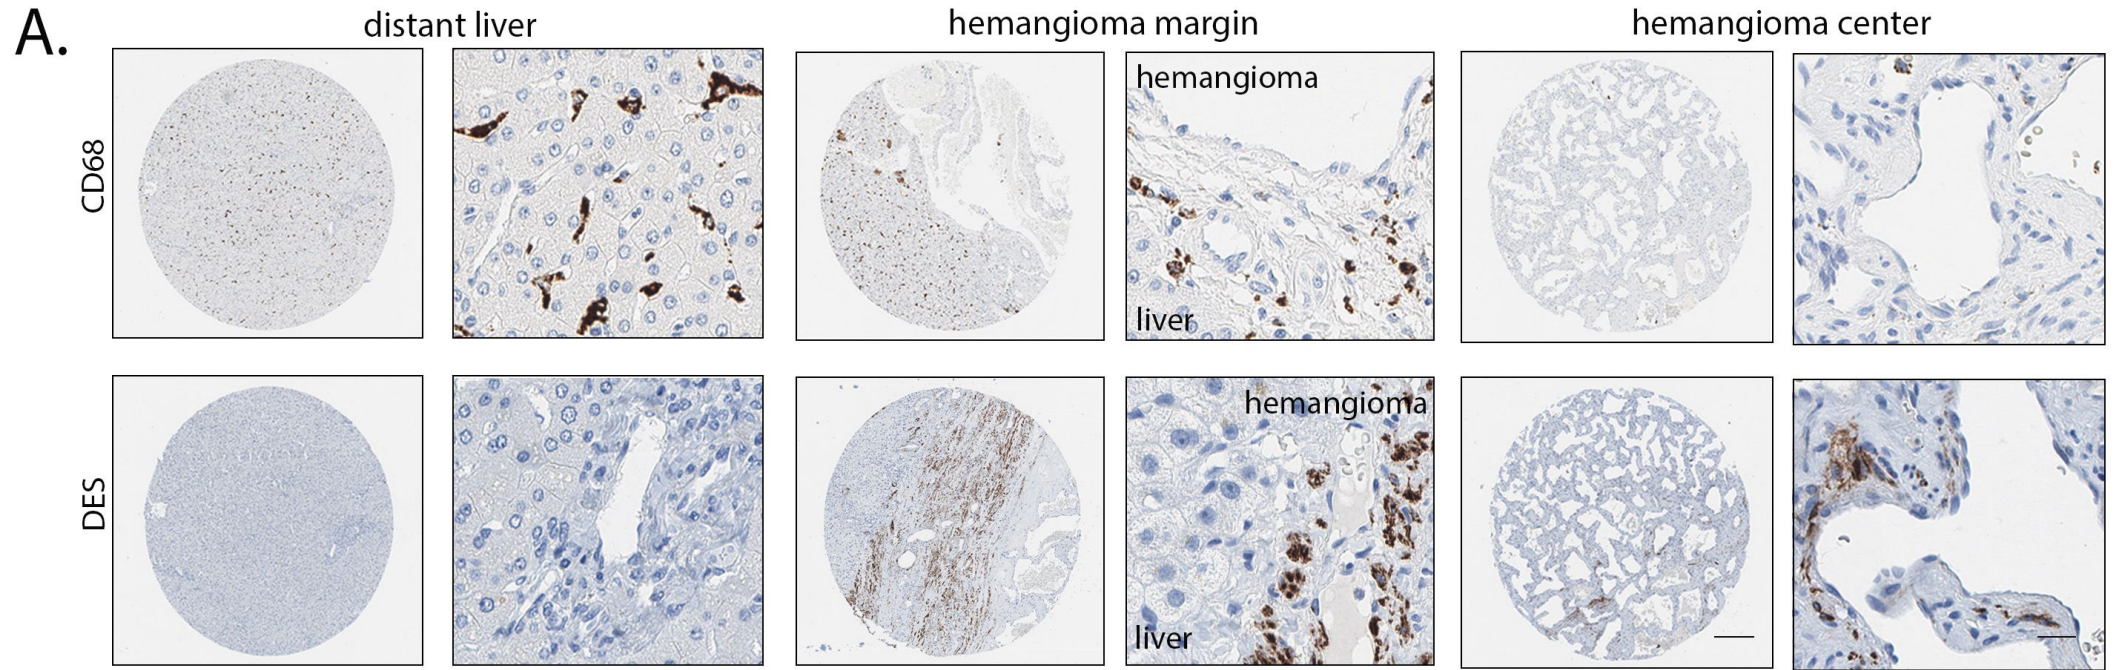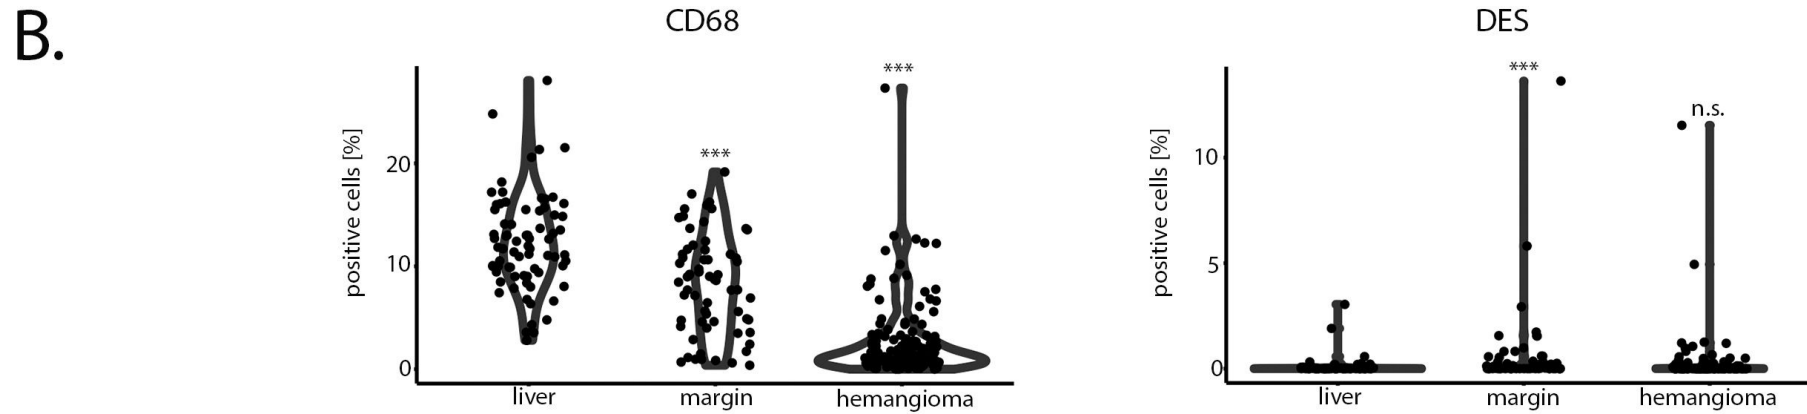

# Supplemental Figure 3

A.

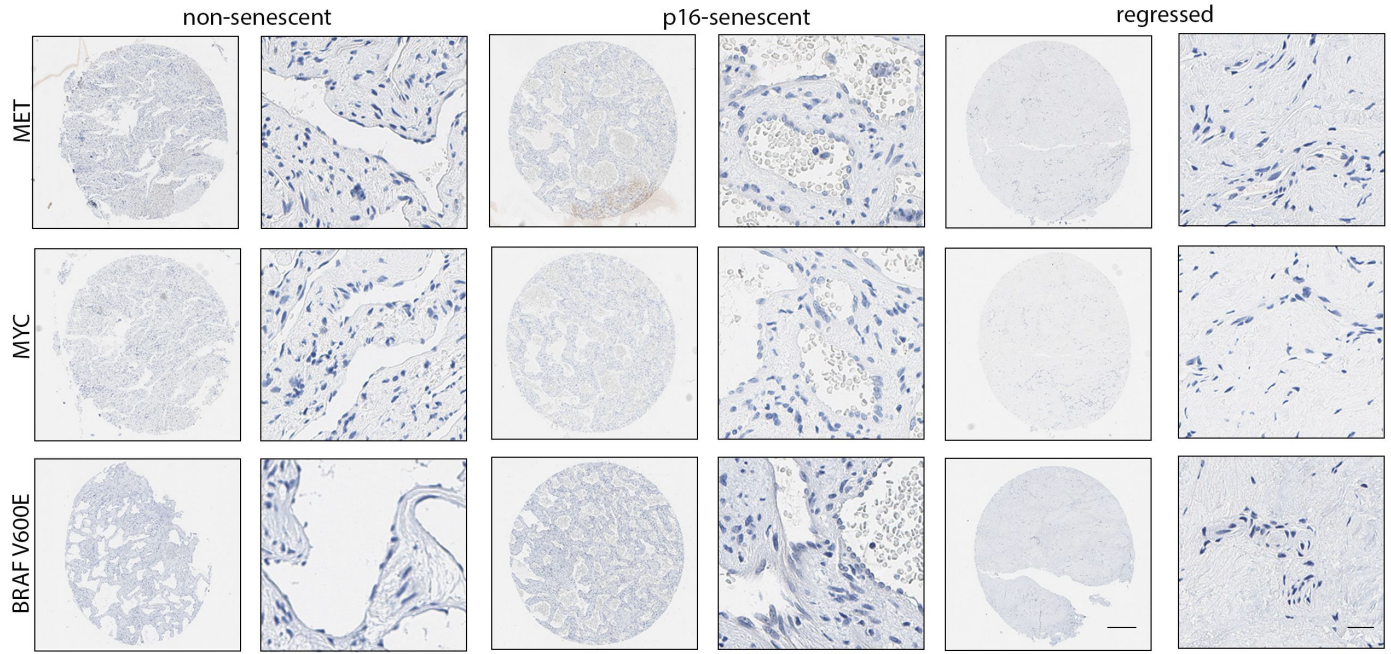

B.

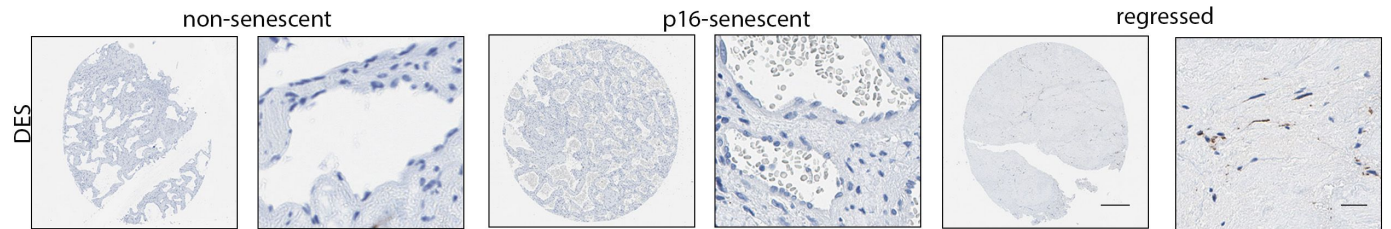

C.

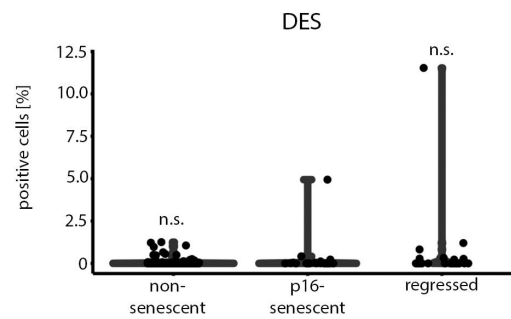

Supplement: sj-pdf-1-jhc-10.1369_00221554221112701.pdf [file sj-pdf-1-jhc-10.1369_00221554221112701.pdf]
